# Supplementary material for: A panel of emerging EMT genes identified in malignant mesothelioma
Source: PubMed Central journal article supplement (PMC8770645; doi:10.1038/s41598-022-04973-x), 2022-01-19

## Supplementary data

**Table 1S Identification of EMT hallmark gene sets.** Tumor cell genes (top) and non-tumor cell genes (bottom) by Gene Set Enrichment Analysis-Molecular Signatures Database (GSEA-MSigDB)

### 12 tumor cell genes overlapped in EMT hallmark gene set

| Symbol   | Gene Description                                                                |
|----------|---------------------------------------------------------------------------------|
| GJA1     | gap junction protein alpha 1 [Source:HGNC Symbol;Acc:HGNC:4274]                 |
| IGFBP4   | insulin like growth factor binding protein 4 [Source:HGNC Symbol;Acc:HGNC:5473] |
| ITGAV    | integrin subunit alpha V [Source:HGNC Symbol;Acc:HGNC:6150]                     |
| APLP1    | amyloid beta precursor like protein 1 [Source:HGNC Symbol;Acc:HGNC:597]         |
| VCAM1    | vascular cell adhesion molecule 1 [Source:HGNC Symbol;Acc:HGNC:12663]           |
| COL5A2   | collagen type V alpha 2 chain [Source:HGNC Symbol;Acc:HGNC:2210]                |
| TIMP3    | TIMP metalloproteinase inhibitor 3 [Source:HGNC Symbol;Acc:HGNC:11822]          |
| SDC4     | syndecan 4 [Source:HGNC Symbol;Acc:HGNC:10661]                                  |
| SERPINH1 | serpin family H member 1 [Source:HGNC Symbol;Acc:HGNC:1546]                     |
| GAS1     | growth arrest specific 1 [Source:HGNC Symbol;Acc:HGNC:4165]                     |
| FBLN2    | fibulin 2 [Source:HGNC Symbol;Acc:HGNC:3601]                                    |
| CALD1    | caldesmon 1 [Source:HGNC Symbol;Acc:HGNC:1441]                                  |

### 11 non-tumor cell genes overlapped in EMT hallmark gene set

| Symbol    | Gene Description                                                              |
|-----------|-------------------------------------------------------------------------------|
| SPARC     | secreted protein acidic and cysteine rich [Source:HGNC Symbol;Acc:HGNC:11219] |
| HTRA1     | HtrA serine peptidase 1 [Source:HGNC Symbol;Acc:HGNC:9476]                    |
| DCN       | decorin [Source:HGNC Symbol;Acc:HGNC:2705]                                    |
| BGN       | biglycan [Source:HGNC Symbol;Acc:HGNC:1044]                                   |
| TNFRSF12A | TNF receptor superfamily member 12A [Source:HGNC Symbol;Acc:HGNC:18152]       |
| TPM2      | tropomyosin 2 [Source:HGNC Symbol;Acc:HGNC:12011]                             |
| TGM2      | transglutaminase 2 [Source:HGNC Symbol;Acc:HGNC:11778]                        |
| FBLN1     | fibulin 1 [Source:HGNC Symbol;Acc:HGNC:3600]                                  |
| PCOLCE    | procollagen C-endopeptidase enhancer [Source:HGNC Symbol;Acc:HGNC:8738]       |
| ACTA2     | "actin alpha 2, smooth muscle [Source:HGNC Symbol;Acc:HGNC:130]"              |
| TPM1      | tropomyosin 1 [Source:HGNC Symbol;Acc:HGNC:12010]                             |

**Supplementary data**

**Figure 1S EMT genes expressed predominantly on tumor cells**

A. Mouse data: scRNA-Seq. EMT genes expressed in tumor cell clusters.

B. Patient data: scRNA-Seq. EMT genes expressed in tumor cell clusters (MSLN+WT1+).

**A**

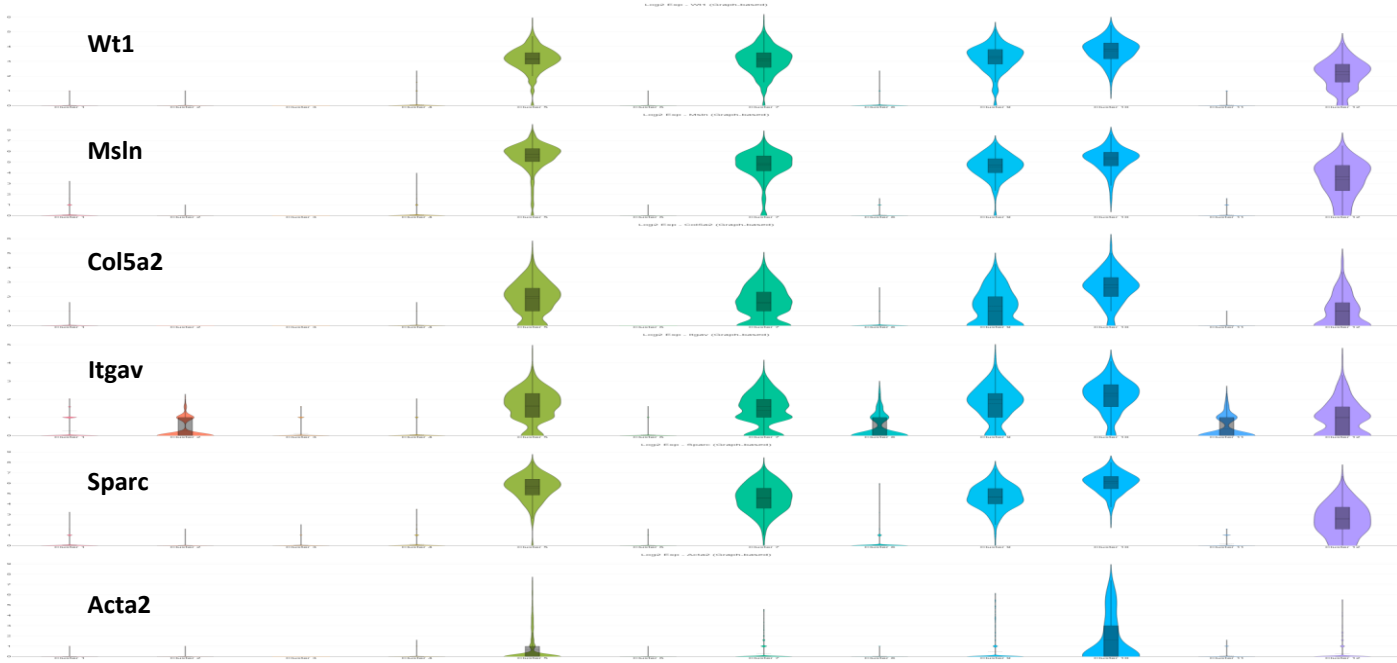

**B**

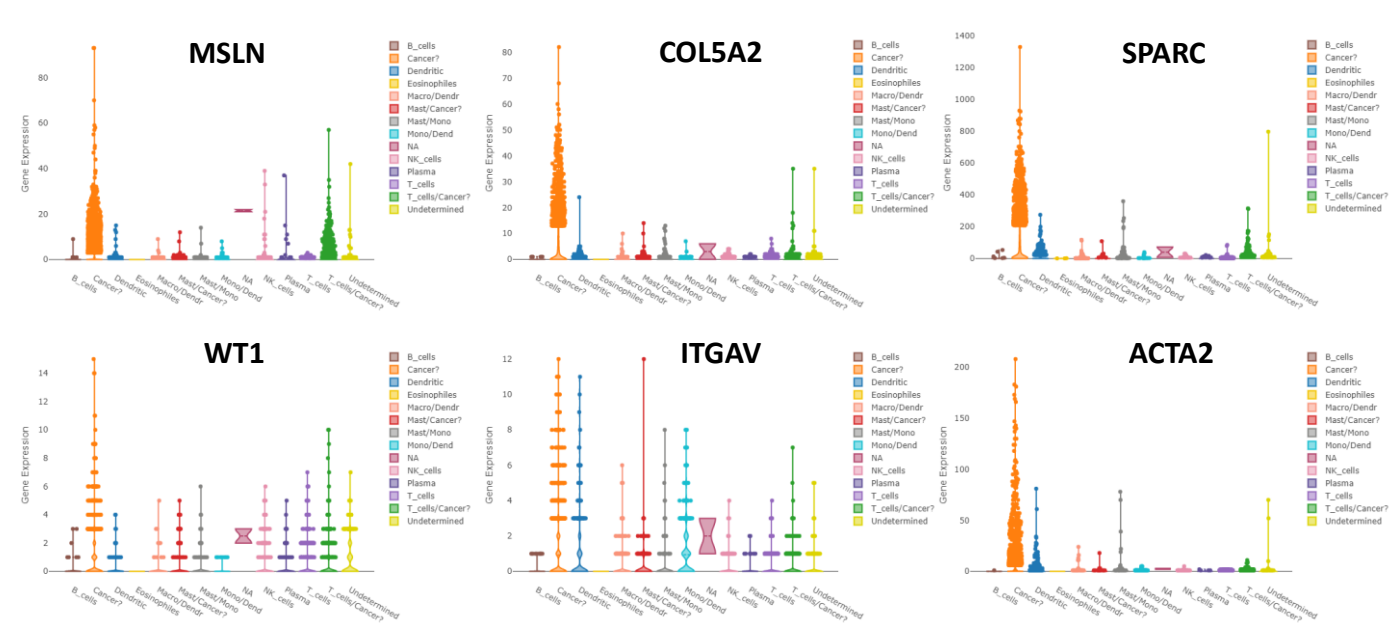

*Supplementary data*

**Figure 2S** Co-expression of EMT genes in MESO cohort of TCGA analysed by **Timer2.0**. Gene expression of *COL5A2*, *ITGAV*, *SPARC* and *ACTA2* was observed positively correlated between each other.

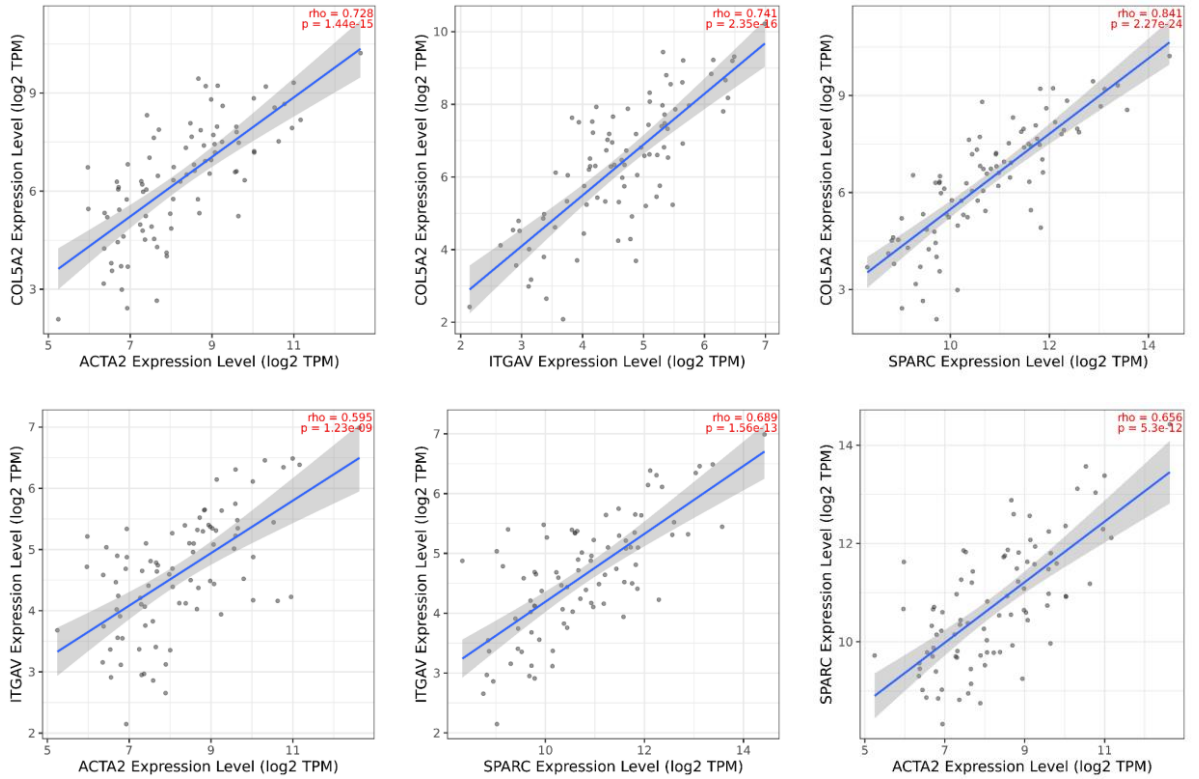

## Supplementary data

**Table 2S Identification of EMT hallmark gene sets.** Among the list, 12/72 tumor cell genes are involved in EMT pathway.

| Gene Id   | Gene Symbol | Gene Description (EMT genes are highlighted)                                    |
|-----------|-------------|---------------------------------------------------------------------------------|
| 2697      | GJA1        | gap junction protein alpha 1 [Source:HGNC Symbol;Acc:HGNC:4274]                 |
| 3487      | IGFBP4      | insulin like growth factor binding protein 4 [Source:HGNC Symbol;Acc:HGNC:5473] |
| 3685      | ITGAV       | integrin subunit alpha V [Source:HGNC Symbol;Acc:HGNC:6150]                     |
| 333       | APLP1       | amyloid beta precursor like protein 1 [Source:HGNC Symbol;Acc:HGNC:597]         |
| 7412      | VCAM1       | vascular cell adhesion molecule 1 [Source:HGNC Symbol;Acc:HGNC:12663]           |
| 1290      | COL5A2      | collagen type V alpha 2 chain [Source:HGNC Symbol;Acc:HGNC:2210]                |
| 7078      | TIMP3       | TIMP metalloproteinase inhibitor 3 [Source:HGNC Symbol;Acc:HGNC:11822]          |
| 6385      | SDC4        | syndecan 4 [Source:HGNC Symbol;Acc:HGNC:10661]                                  |
| 871       | SERPINH1    | serpin family H member 1 [Source:HGNC Symbol;Acc:HGNC:1546]                     |
| 2619      | GAS1        | growth arrest specific 1 [Source:HGNC Symbol;Acc:HGNC:4165]                     |
| 2199      | FBLN2       | fibulin 2 [Source:HGNC Symbol;Acc:HGNC:3601]                                    |
| 800       | CALD1       | caldesmon 1 [Source:HGNC Symbol;Acc:HGNC:1441]                                  |
| 3880      | KRT19       | keratin 19 [Source:HGNC Symbol;Acc:HGNC:6436]                                   |
| 9022      | CLIC3       | chloride intracellular channel 3 [Source:HGNC Symbol;Acc:HGNC:2064]             |
| 3875      | KRT18       | keratin 18 [Source:HGNC Symbol;Acc:HGNC:6430]                                   |
| 5420      | PODXL       | podocalyxin like [Source:HGNC Symbol;Acc:HGNC:9171]                             |
| 10397     | NDRG1       | N-myc downstream regulated 1 [Source:HGNC Symbol;Acc:HGNC:7679]                 |
| 5269      | SERPINB6    | serpin family B member 6 [Source:HGNC Symbol;Acc:HGNC:8950]                     |
| 79971     | WLS         | Wnt ligand secretion mediator [Source:HGNC Symbol;Acc:HGNC:30238]               |
| 87        | ACTN1       | actinin alpha 1 [Source:HGNC Symbol;Acc:HGNC:163]                               |
| 24146     | CLDN15      | claudin 15 [Source:HGNC Symbol;Acc:HGNC:2036]                                   |
| 3675      | ITGA3       | integrin subunit alpha 3 [Source:HGNC Symbol;Acc:HGNC:6139]                     |
| 55742     | PARVA       | parvin alpha [Source:HGNC Symbol;Acc:HGNC:14652]                                |
| 4131      | MAP1B       | microtubule associated protein 1B [Source:HGNC Symbol;Acc:HGNC:6836]            |
| 50937     | CDON        | "cell adhesion associated, oncogene regulated [Source:HGNC:17104]"              |
| 216       | ALDH1A1     | aldehyde dehydrogenase 1 family member A1 [Source:HGNC:402]                     |
| 10512     | SEMA3C      | semaphorin 3C [Source:HGNC Symbol;Acc:HGNC:10725]                               |
| 1465      | CSRP1       | cysteine and glycine rich protein 1 [Source:HGNC Symbol;Acc:HGNC:2469]          |
| 4071      | TM4SF1      | transmembrane 4 L six family member 1 [Source:HGNC Symbol;Acc:HGNC:11853]       |
| 29785     | CYP2S1      | cytochrome P450 family 2 subfamily 5 member 1 [Source:HGNC:15654]               |
| 23468     | CBX5        | chromobox 5 [Source:HGNC Symbol;Acc:HGNC:1555]                                  |
| 4212      | MEIS2       | Meis homeobox 2 [Source:HGNC Symbol;Acc:HGNC:7001]                              |
| 10630     | PDPN        | podoplanin [Source:HGNC Symbol;Acc:HGNC:29602]                                  |
| 105375355 | UPK3B       | uroplakin 3B [Source:HGNC Symbol;Acc:HGNC:21444]                                |
| 90865     | IL33        | interleukin 33 [Source:HGNC Symbol;Acc:HGNC:16028]                              |
| 22808     | MRAS        | muscle RAS oncogene homolog [Source:HGNC Symbol;Acc:HGNC:7227]                  |
| 10232     | MSLN        | mesothelin [Source:HGNC Symbol;Acc:HGNC:7371]                                   |
| 10417     | SPON2       | spondin 2 [Source:HGNC Symbol;Acc:HGNC:11253]                                   |
| 128414    | NKAIN4      | sodium/potassium transporting ATPase interacting 4 [Source:HGNC:16191]          |
| 1525      | CXADR       | CXADR Ig-like cell adhesion molecule [Source:HGNC Symbol;Acc:HGNC:2559]         |
| 164312    | LRRN4       | leucine rich repeat neuronal 4 [Source:HGNC Symbol;Acc:HGNC:16208]              |
| 26022     | TMEM98      | transmembrane protein 98 [Source:HGNC Symbol;Acc:HGNC:24529]                    |
| 2823      | GPM6A       | glycoprotein M6A [Source:HGNC Symbol;Acc:HGNC:4460]                             |
| 284654    | RSPO1       | R-spondin 1 [Source:HGNC Symbol;Acc:HGNC:21679]                                 |
| 2938      | GSTA1       | glutathione S-transferase alpha 1 [Source:HGNC Symbol;Acc:HGNC:4626]            |
| 3855      | KRT7        | keratin 7 [Source:HGNC Symbol;Acc:HGNC:6445]                                    |
| 3861      | KRT14       | keratin 14 [Source:HGNC Symbol;Acc:HGNC:6416]                                   |
| 387496    | RASL11A     | RAS like family 11 member A [Source:HGNC Symbol;Acc:HGNC:23802]                 |
| 387597    | ILDR2       | immunoglobulin like domain containing receptor 2 [Source:HGNC:18131]            |
| 389558    | FAM180A     | family with sequence similarity 180 member A [Source:HGNC:33773]                |
| 3911      | LAMA5       | laminin subunit alpha 5 [Source:HGNC Symbol;Acc:HGNC:6485]                      |
| 3957      | LGALS2      | galectin 2 [Source:HGNC Symbol;Acc:HGNC:6562]                                   |
| 3995      | FADS3       | fatty acid desaturase 3 [Source:HGNC Symbol;Acc:HGNC:3576]                      |
| 4642      | MYO1D       | myosin ID [Source:HGNC Symbol;Acc:HGNC:7598]                                    |
| 51196     | PLCE1       | phospholipase C epsilon 1 [Source:HGNC Symbol;Acc:HGNC:17175]                   |
| 51232     | CRIM1       | cysteine rich transmembrane BMP regulator 1 [Source:HGNC:2359]                  |
| 5349      | FXYD3       | FXYD domain containing ion transport regulator 3 [Source:HGNC:4027]             |
| 55512     | SMPD3       | sphingomyelin phosphodiesterase 3 [Source:HGNC Symbol;Acc:HGNC:14240]           |
| 57493     | HEG1        | heart development protein with EGF like domains 1 [Source:HGNC:29227]           |
| 5792      | PTPRF       | protein tyrosine phosphatase receptor type F [Source:HGNC:9670]                 |
| 64759     | TNS3        | tensin 3 [Source:HGNC Symbol;Acc:HGNC:21616]                                    |
| 66000     | TMEM108     | transmembrane protein 108 [Source:HGNC Symbol;Acc:HGNC:28451]                   |
| 6659      | SOX4        | SRY-box transcription factor 4 [Source:HGNC Symbol;Acc:HGNC:11200]              |
| 728113    | ANXA8L1     | annexin A8 like 1 [Source:HGNC Symbol;Acc:HGNC:23334]                           |
| 7348      | UPK1B       | uroplakin 1B [Source:HGNC Symbol;Acc:HGNC:12578]                                |
| 745       | MYRF        | myelin regulatory factor [Source:HGNC Symbol;Acc:HGNC:1181]                     |
| 7490      | WT1         | WT1 transcription factor [Source:HGNC Symbol;Acc:HGNC:12796]                    |
| 780       | DDR1        | discoidin domain receptor tyrosine kinase 1 [Source:HGNC Symbol;Acc:HGNC:2730]  |
| 80114     | BICC1       | BicC family RNA binding protein 1 [Source:HGNC Symbol;Acc:HGNC:19351]           |
| 9032      | TM4SF5      | transmembrane 4 L six family member 5 [Source:HGNC Symbol;Acc:HGNC:11857]       |
| 91584     | PLXNA4      | plexin A4 [Source:HGNC Symbol;Acc:HGNC:9102]                                    |
| 93035     | PKHD1L1     | PKHD1 like 1 [Source:HGNC Symbol;Acc:HGNC:20313]                                |

## Supplementary data

**Table 2S Identification of EMT hallmark gene sets.** Among the list, 11/55 non-tumor cell genes are involved in EMT pathway.

| Gene Id   | Gene Symbol  | Gene Description (EMT genes are highlighted)                                                         |
|-----------|--------------|------------------------------------------------------------------------------------------------------|
| 6678      | SPARC        | secreted protein acidic and cysteine rich [Source:HGNC Symbol;Acc:HGNC:11219]                        |
| 5654      | HTRA1        | HtrA serine peptidase 1 [Source:HGNC Symbol;Acc:HGNC:9476]                                           |
| 1634      | DCN          | decorin [Source:HGNC Symbol;Acc:HGNC:2705]                                                           |
| 633       | BGN          | biglycan [Source:HGNC Symbol;Acc:HGNC:1044]                                                          |
| 51330     | TNFRSF12A    | TNF receptor superfamily member 12A [Source:HGNC Symbol;Acc:HGNC:18152]                              |
| 7169      | TPM2         | tropomyosin 2 [Source:HGNC Symbol;Acc:HGNC:12011]                                                    |
| 7052      | TGM2         | transglutaminase 2 [Source:HGNC Symbol;Acc:HGNC:11778]                                               |
| 2192      | FBLN1        | fibulin 1 [Source:HGNC Symbol;Acc:HGNC:3600]                                                         |
| 5118      | PCOLCE       | procollagen C-endopeptidase enhancer [Source:HGNC Symbol;Acc:HGNC:8738]                              |
| 59        | ACTA2        | "actin alpha 2, smooth muscle [Source:HGNC Symbol;Acc:HGNC:130]"                                     |
| 7168      | TPM1         | tropomyosin 1 [Source:HGNC Symbol;Acc:HGNC:12010]                                                    |
| 1191      | CLU          | clusterin [Source:HGNC Symbol;Acc:HGNC:2095]                                                         |
| 2934      | GSN          | gelsolin [Source:HGNC Symbol;Acc:HGNC:4620]                                                          |
| 718       | C3           | complement C3 [Source:HGNC Symbol;Acc:HGNC:1318]                                                     |
| 716       | C1S          | complement C1s [Source:HGNC Symbol;Acc:HGNC:1247]                                                    |
| 710       | SERPING1     | serpin family G member 1 [Source:HGNC Symbol;Acc:HGNC:1228]                                          |
| 11098     | PRSS23       | serine protease 23 [Source:HGNC Symbol;Acc:HGNC:14370]                                               |
| 857       | CAV1         | caveolin 1 [Source:HGNC Symbol;Acc:HGNC:1527]                                                        |
| 3005      | H1-0         | H1.0 linker histone [Source:HGNC Symbol;Acc:HGNC:4714]                                               |
| 3489      | IGFBP6       | insulin like growth factor binding protein 6 [Source:HGNC Symbol;Acc:HGNC:5475]                      |
| 1410      | CRYAB        | crystallin alpha B [Source:HGNC Symbol;Acc:HGNC:2389]                                                |
| 165       | AEBP1        | AE binding protein 1 [Source:HGNC Symbol;Acc:HGNC:303]                                               |
| 3490      | IGFBP7       | insulin like growth factor binding protein 7 [Source:HGNC Symbol;Acc:HGNC:5476]                      |
| 9806      | SPOCK2       | "SPARC (osteonectin), cwcv and kazal like domains proteoglycan 2 [Source:HGNC:13564]"                |
| 7167      | TPI1         | triosephosphate isomerase 1 [Source:HGNC Symbol;Acc:HGNC:12009]                                      |
| 6566      | SLC16A1      | solute carrier family 16 member 1 [Source:HGNC Symbol;Acc:HGNC:10922]                                |
| 1363      | CPE          | carboxypeptidase E [Source:HGNC Symbol;Acc:HGNC:2303]                                                |
| 8611      | PLPP1        | phospholipid phosphatase 1 [Source:HGNC Symbol;Acc:HGNC:9228]                                        |
| 8848      | TSC22D1      | TSC22 domain family member 1 [Source:HGNC Symbol;Acc:HGNC:16826]                                     |
| 2202      | EFEMP1       | EGF containing fibulin extracellular matrix protein 1 [Source:HGNC:3218]                             |
| 4781      | NFIB         | nuclear factor I B [Source:HGNC Symbol;Acc:HGNC:7785]                                                |
| 23710     | GABARAPL1    | GABA type A receptor associated protein like 1 [Source:HGNC Symbol;Acc:HGNC:4068]                    |
| 9411      | ARHGAP29     | Rho GTPase activating protein 29 [Source:HGNC Symbol;Acc:HGNC:30207]                                 |
| 977       | CD151        | CD151 molecule (Raph blood group) [Source:HGNC Symbol;Acc:HGNC:1630]                                 |
| 55107     | ANO1         | anoctamin 1 [Source:HGNC Symbol;Acc:HGNC:21625]                                                      |
| 481       | ATP1B1       | ATPase Na <sup>+</sup> /K <sup>+</sup> transporting subunit beta 1 [Source:HGNC Symbol;Acc:HGNC:804] |
| 4734      | NEDD4        | NEDD4 E3 ubiquitin protein ligase [Source:HGNC Symbol;Acc:HGNC:7727]                                 |
| 7103      | TSPAN8       | tetraspanin 8 [Source:HGNC Symbol;Acc:HGNC:11855]                                                    |
| 100532736 | MICOS10-NBL1 | MICOS10-NBL1 readthrough [Source:HGNC Symbol;Acc:HGNC:48338]                                         |
| 10079     | ATP9A        | ATPase phospholipid transporting 9A (putative) [Source:HGNC:13540]                                   |
| 10787     | NCKAP1       | NCK associated protein 1 [Source:HGNC Symbol;Acc:HGNC:7666]                                          |
| 151887    | CCDC80       | coiled-coil domain containing 80 [Source:HGNC Symbol;Acc:HGNC:30649]                                 |
| 23164     | MPRIP        | myosin phosphatase Rho interacting protein [Source:HGNC Symbol;Acc:HGNC:30321]                       |
| 23213     | SULF1        | sulfatase 1 [Source:HGNC Symbol;Acc:HGNC:20391]                                                      |
| 3281      | HSBP1        | heat shock factor binding protein 1 [Source:HGNC Symbol;Acc:HGNC:5203]                               |
| 379       | ARL4D        | ADP ribosylation factor like GTPase 4D [Source:HGNC Symbol;Acc:HGNC:656]                             |
| 3791      | KDR          | kinase insert domain receptor [Source:HGNC Symbol;Acc:HGNC:6307]                                     |
| 4054      | LTBP3        | latent transforming growth factor beta binding protein 3 [Source:HGNC:6716]                          |
| 51765     | STK26        | serine/threonine kinase 26 [Source:HGNC Symbol;Acc:HGNC:18174]                                       |
| 55353     | LAPTM4B      | lysosomal protein transmembrane 4 beta [Source:HGNC Symbol;Acc:HGNC:13646]                           |
| 58189     | WFDC1        | WAP four-disulfide core domain 1 [Source:HGNC Symbol;Acc:HGNC:15466]                                 |
| 58480     | RHOU         | ras homolog family member U [Source:HGNC Symbol;Acc:HGNC:17794]                                      |
| 6038      | RNASE4       | ribonuclease A family member 4 [Source:HGNC Symbol;Acc:HGNC:10047]                                   |
| 8510      | MMP23B       | matrix metalloproteinase 23B [Source:HGNC Symbol;Acc:HGNC:7171]                                      |



**Supplementary data**

**Figure 3S Network of OMICS profile of interest.** Significant correlation between gene of interest (RNA expression) in TCGA cohort MESO with OMICS profile with FDR < 0.05. OMICS includes mRNA, miRNA, copy number alteration (CNA), methylation, and reverse phase protein analysis (RPPA) correlation was also analyzed. Only the most significantly correlated genes (*COL5A2*, *ITGAV*, *SPARC* and *ACTA2*) were presented.

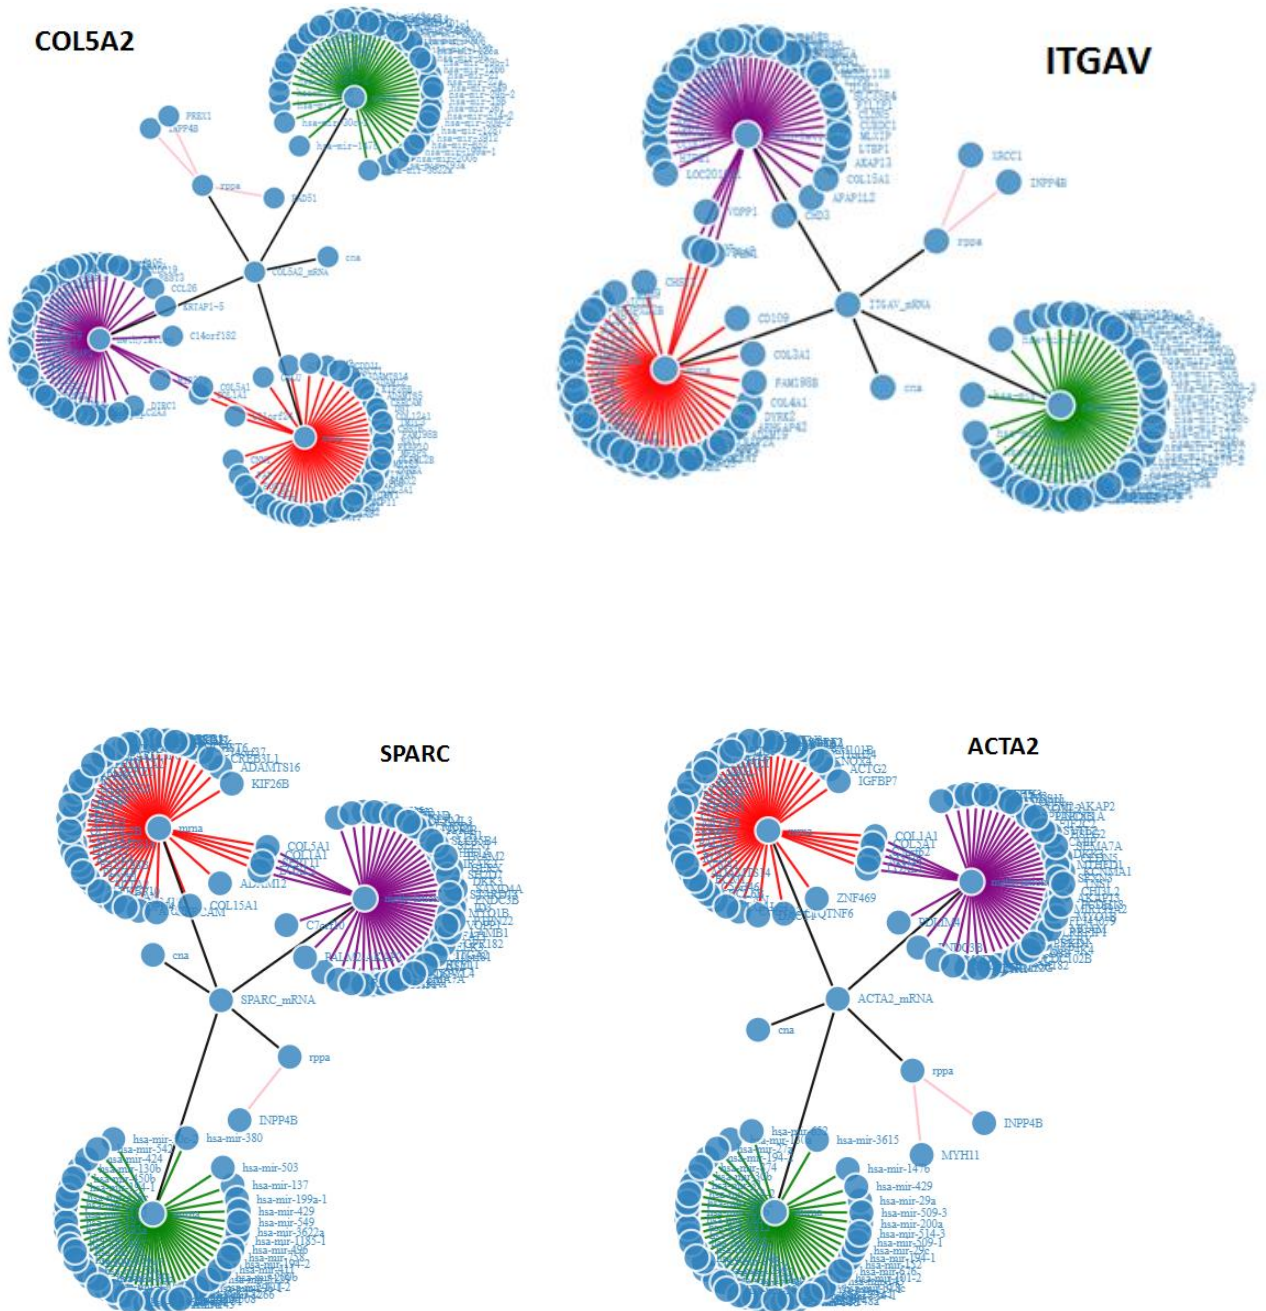

*Supplementary data*

**Fig. 4S Gene expression *COL5A2*, *ITGAV*, *SPARC* and *ACTA2* in Epithelioid vs non-Epithelioid subtype in MESO patients.** A) Dotplot of 4 gene expression in scRNA-Seq was shown in five naïve MPM patients, and *CDH1* and *VIM* were included as controls. B) Histology of HE staining of biphasic (SMTR02T0) and epithelioid (SMTR03T0) subtype.

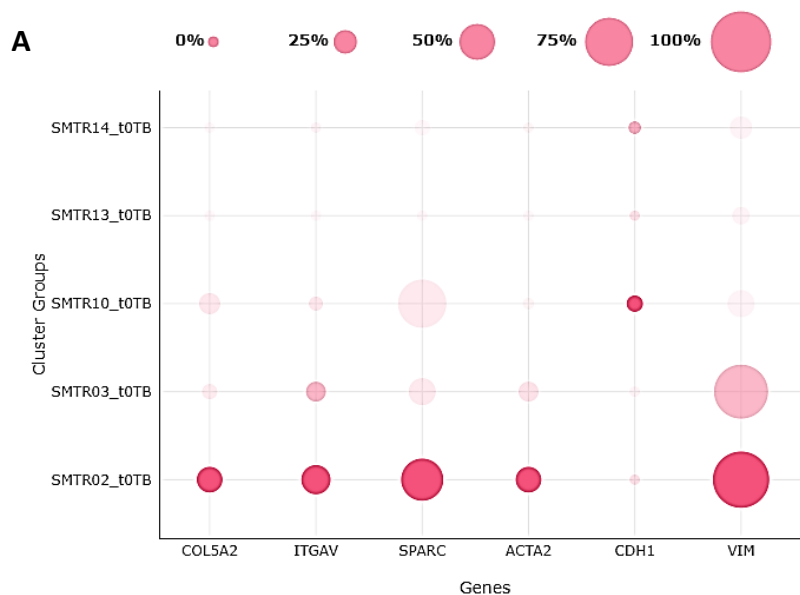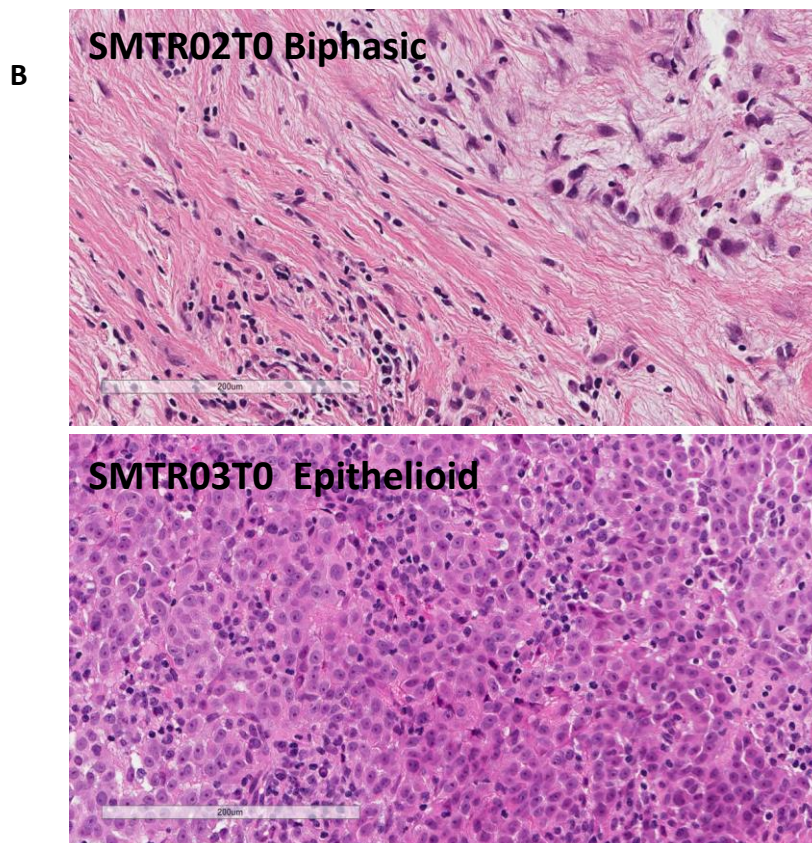

**Supplementary data**

**Figure 5S COL5A2 and SPARC gene expression correlated with immune enrichment in MESO cohort of TCGA database. COL5A2 (top panel) and SPARC (bottom panel) gene expression correlated with immune enrichment: Macrophage, Th2, Treg and NKT in TCGA.**

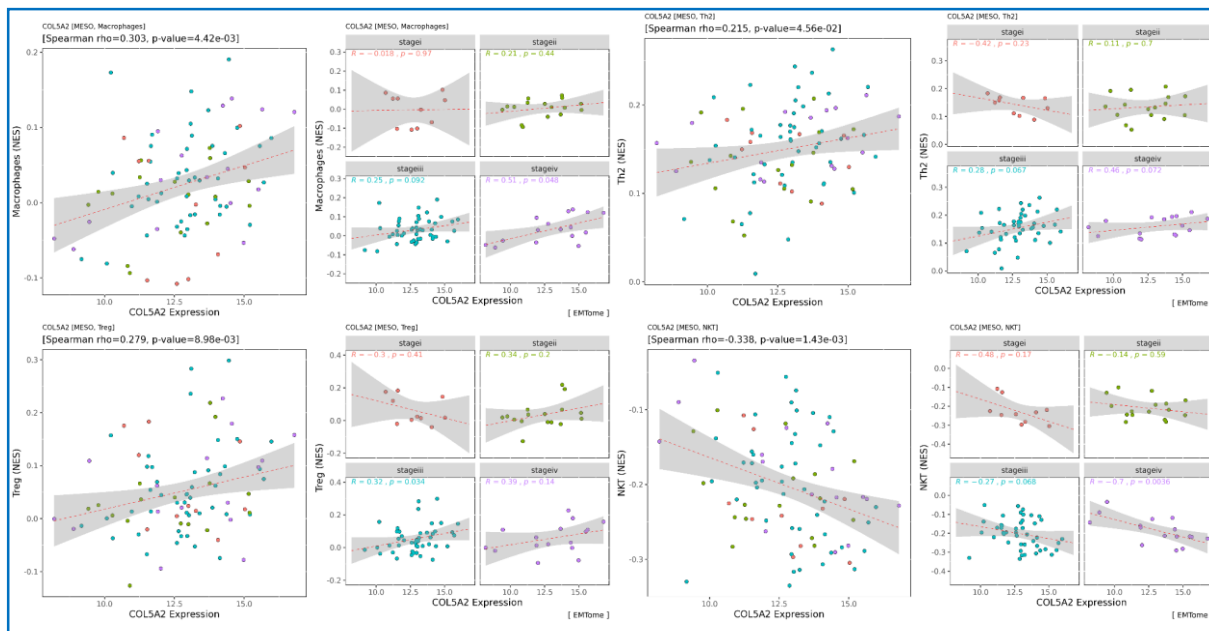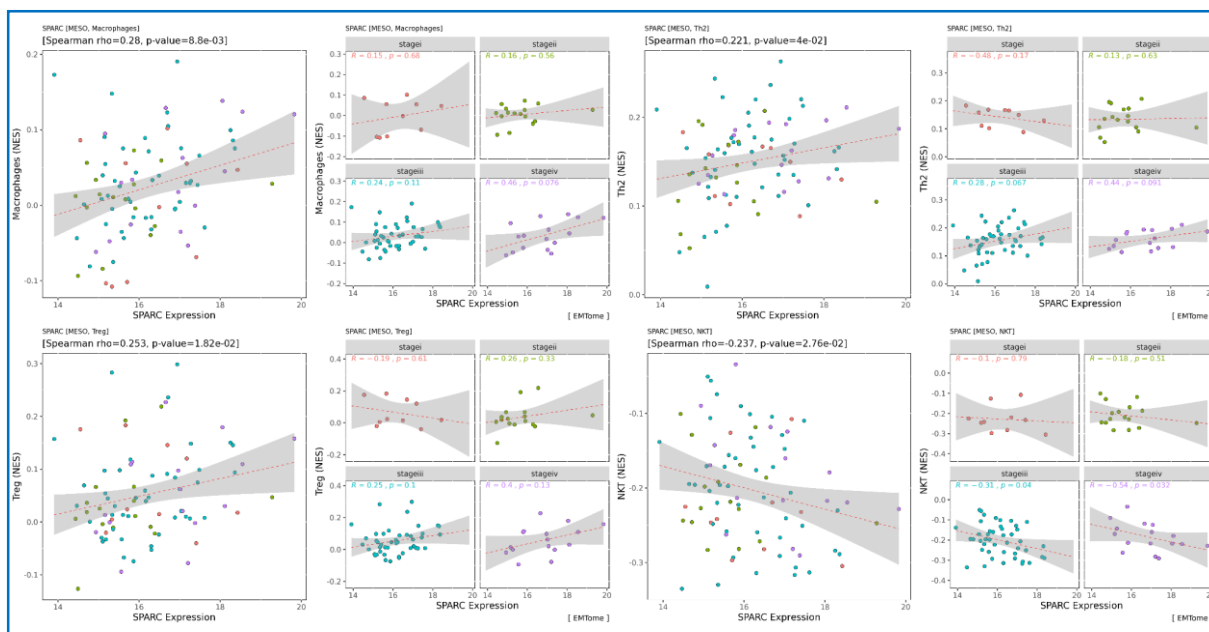



**Supplementary data**

**Figure 6S *ITGAV* and *ACTA2* gene expression correlated with immune enrichment in MESO cohort of TCGA database. *ITGAV* (top panel) and *ACTA2* (bottom) gene expression in correlation with Macrophage, Th2, Treg and NKT in TCGA.**

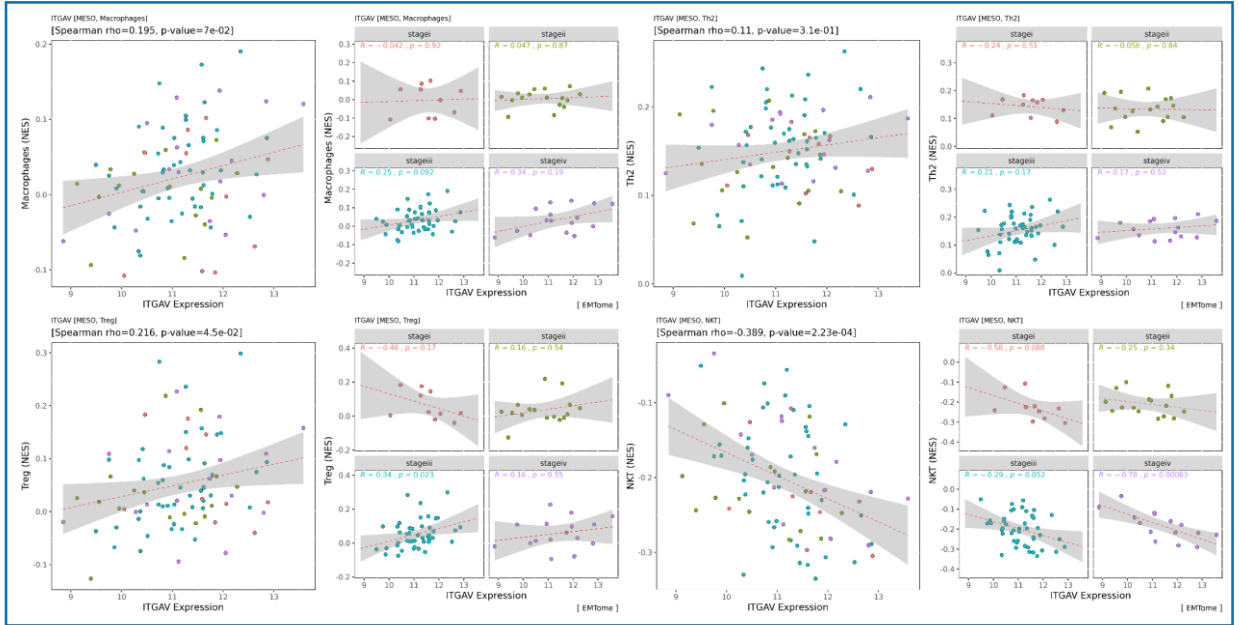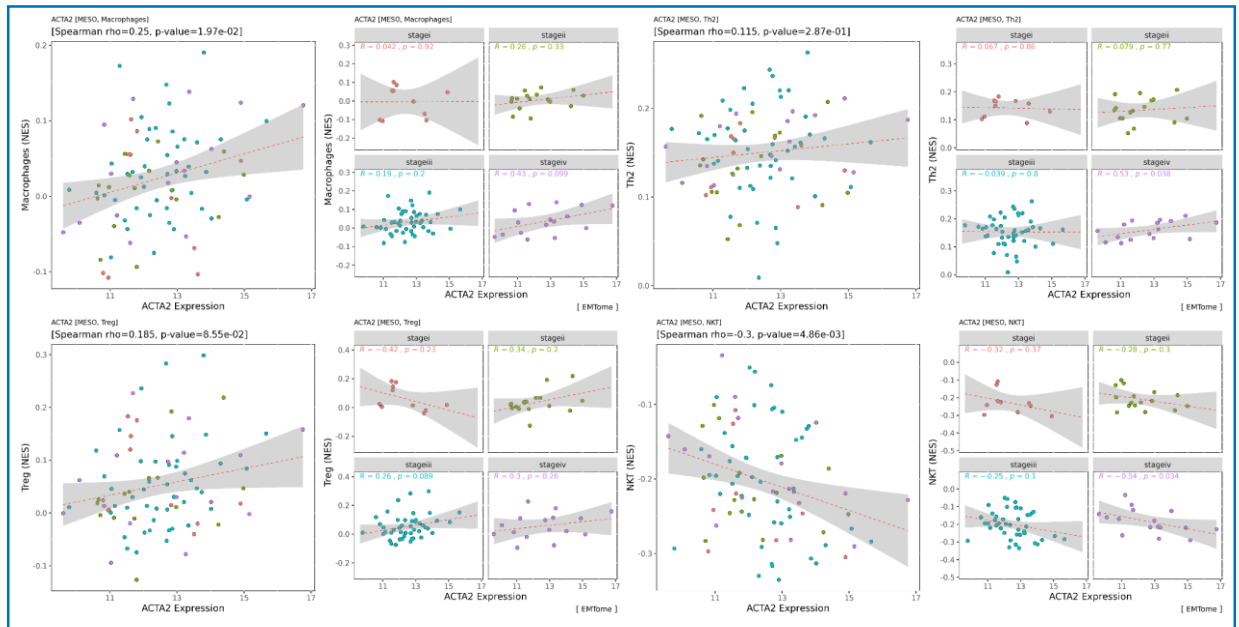



**Supplementary data**

**Figure 8S The immune infiltration associated with gene expression and clinical outcome in MESO of TCGA.**

Gene module performed the correlation of gene expression with cancer associated fibroblasts (CAF) and immune cell infiltrates MDSC, Th2 cells in MESO.

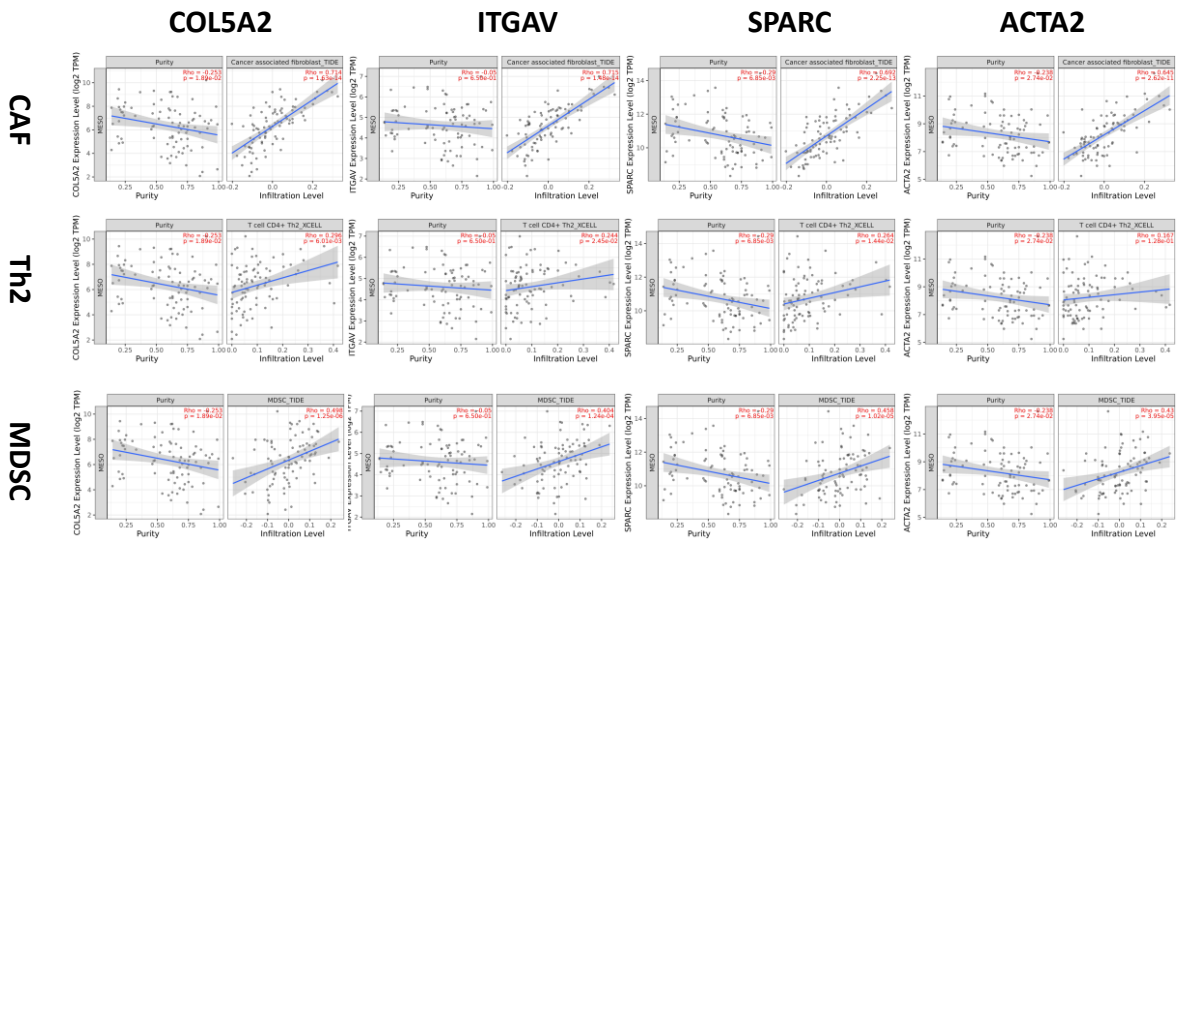

Supplementary data

**Figure 9S The immune infiltration associated with gene expression and clinical outcome in MESO of TCGA.**

Gene module performed the correlation of gene expression with immune cell infiltration level in MESO. EMT gene expression and immune infiltrates of M2 macrophage and Treg cells in correlation with clinical outcome in MESO cohort.

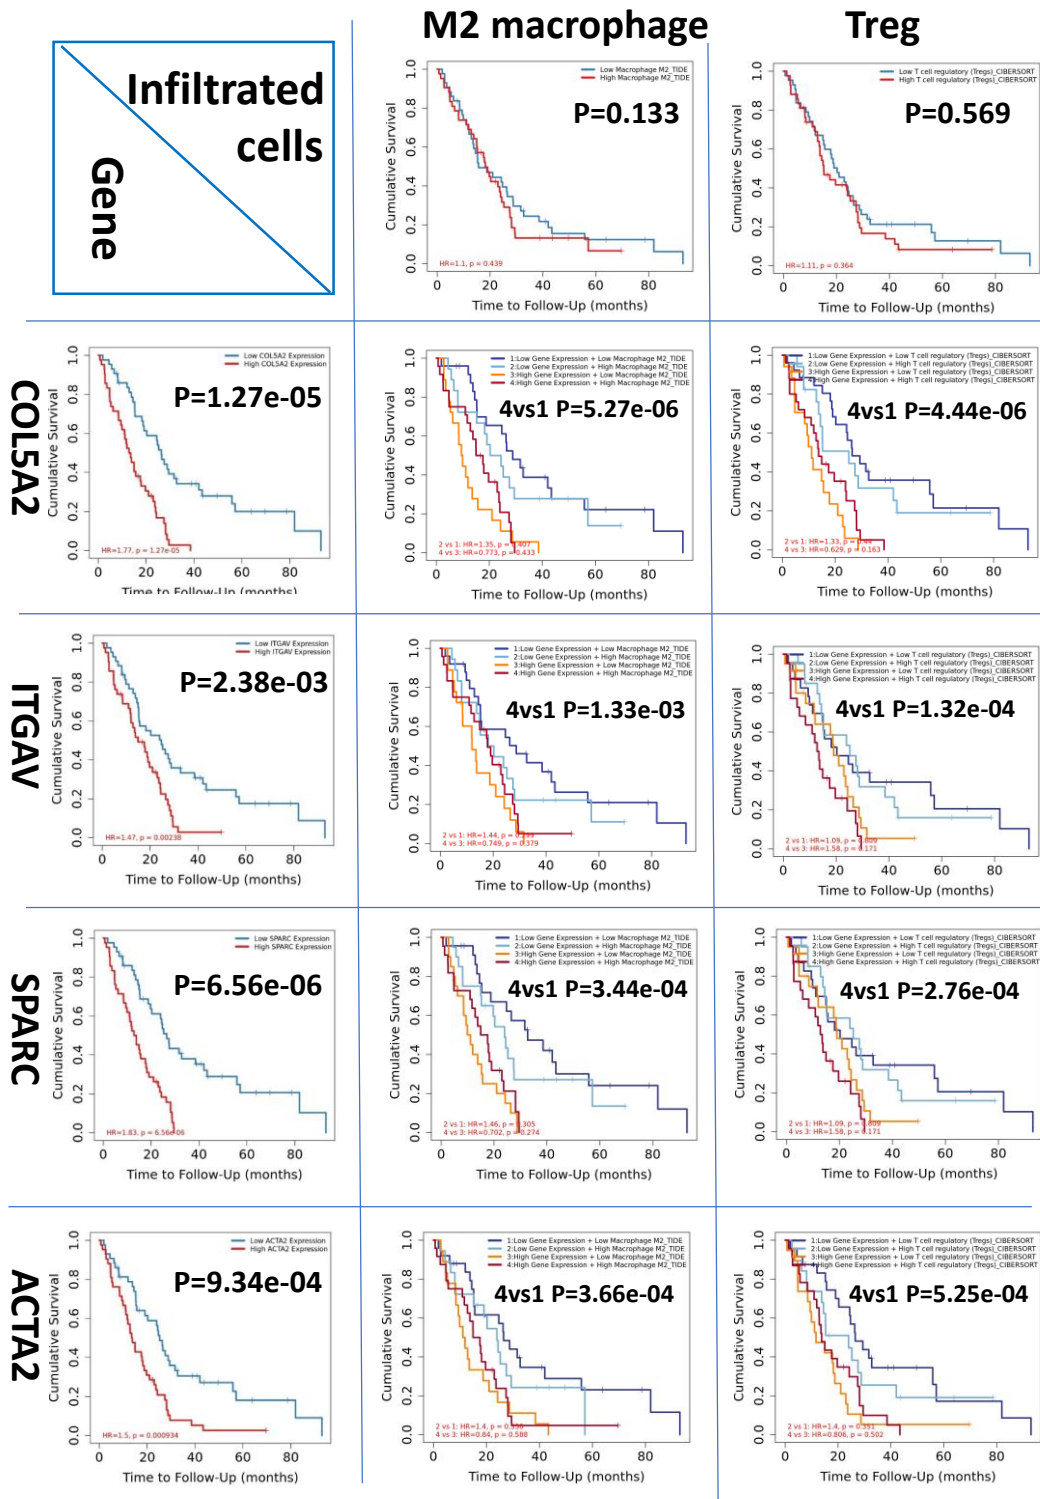

Supplement: 41598_2022_4973_MOESM1_ESM.pdf [file 41598_2022_4973_MOESM1_ESM.pdf]
